# Supplementary figures and images for: Visual Monitoring of Fatty Acid Degradation during Green Tea Storage by Hyperspectral Imaging
Source: MDPI journal article supplement (doi:10.3390/foods12020282), 2023-01-07

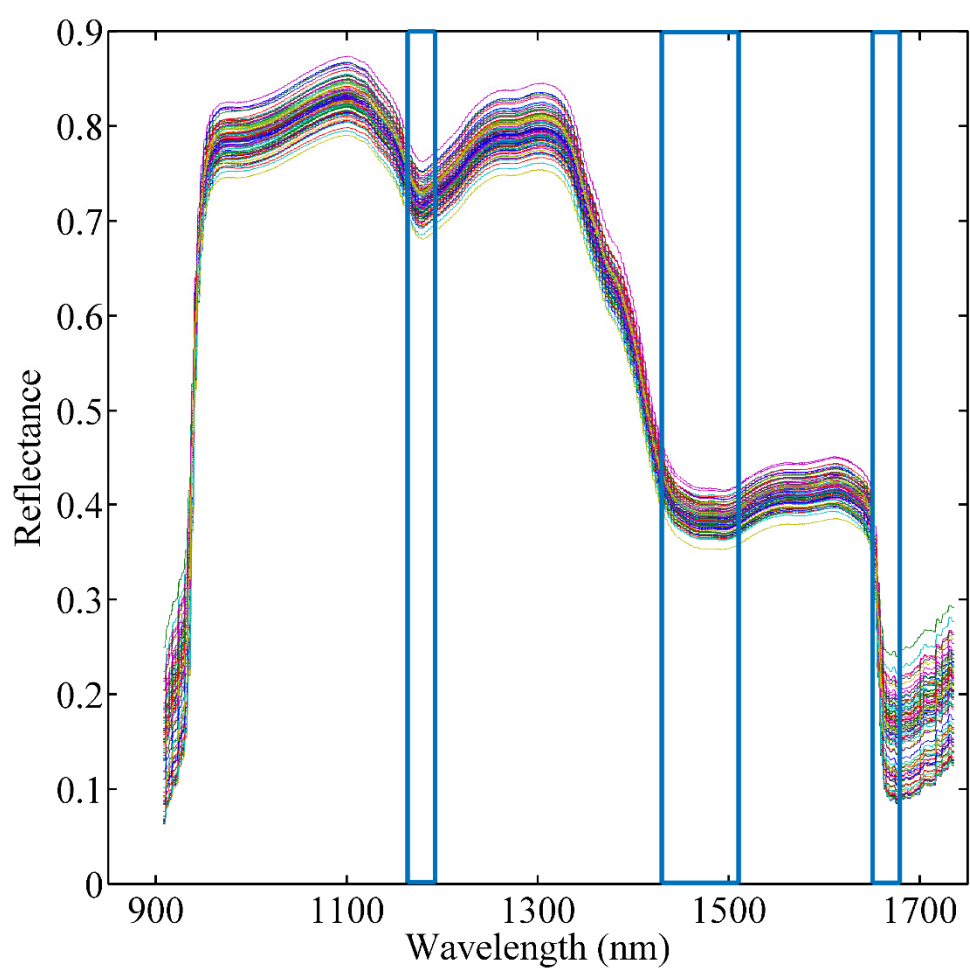

**Figure. S1.** Raw spectral curves of all green tea samples in the range of 900-1700 nm.

Supplement: s1 [file s1]
